# Supplementary material for: Irritable bowel, chronic widespread pain, chronic fatigue and related syndromes are prevalent and highly overlapping in the general population: DanFunD
Source: PubMed Central journal article supplement (PMC7039919; doi:10.1038/s41598-020-60318-6), 2020-02-24
Supplement: 41598_2020_60318_MOESM1_ESM.pdf [file 41598_2020_60318_MOESM1_ESM.pdf]

**Supplementary information for the paper:**

**"Irritable bowel, chronic widespread pain, chronic fatigue and related syndromes are prevalent and highly overlapping in the general population: DanFunD"**

**Authors:**

Marie Weinreich Petersen, Andreas Schröder, Torben Jørgensen, Eva Ørnbøl, Thomas Meinertz Dantoft, Marie Eliassen, Michael Eriksen Benros, Per Fink

**Table 1: Weighted prevalence of functional somatic syndromes and bodily distress syndrome across sex and age groups**

|                         | Women, age (years); % (95% CI) |                         |                         |                         |                       | Men, age (years); % (95% CI) |                       |                        |                       |                      |
|-------------------------|--------------------------------|-------------------------|-------------------------|-------------------------|-----------------------|------------------------------|-----------------------|------------------------|-----------------------|----------------------|
|                         | All (n=942)                    | 18-39 (n=165)           | 40-49 (n=231)           | 50-59 (n=271)           | 60-76 (n=275)         | All (n=648)                  | 18-39 (n=109)         | 40-49 (n=111)          | 50-59 (n=174)         | 60-76 (n=254)        |
| <b>FSS</b>              | <b>11.0</b> (9.4-12.8)         | <b>14.4</b> (10.4-19.5) | <b>13.5</b> (10.1-17.8) | <b>11.6</b> (8.8-15.2)  | <b>7.2</b> (5.0-10.2) | <b>7.2</b> (5.6-9.4)         | <b>8.6</b> (4.6-15.3) | <b>12.8</b> (7.7-20.5) | <b>6.9</b> (4.1-11.3) | <b>4.0</b> (2.6-6.3) |
| <b>IB</b>               | <b>4.9</b> (4.0-6.2)           | <b>8.8</b> (5.8-13.1)   | <b>5.5</b> (3.6-8.5)    | <b>4.5</b> (2.8-7.1)    | <b>2.9</b> (1.9-4.5)  | <b>2.4</b> (1.6-3.7)         | <b>2.7</b> (1.0-7.1)  | <b>5.6</b> (2.6-11.6)  | <b>1.7</b> (0.6-4.3)  | <b>1.3</b> (0.6-2.5) |
| <i>IB pure</i>          | <i>1.7</i> (1.2-2.5)           | <i>3.0</i> (1.7-5.4)    | <i>1.9</i> (1.0-3.4)    | <i>1.3</i> (0.4-3.5)    | <i>1.3</i> (0.7-2.4)  | <i>1.2</i> (0.7-2.2)         | <i>2.3</i> (0.8-6.8)  | <i>2.1</i> (0.7-6.6)   | <i>0.6</i> (0.2-2.1)  | <i>0.7</i> (0.3-1.6) |
| <b>CWP</b>              | <b>2.8</b> (2.1-3.7)           | <b>2.4</b> (1.3-4.4)    | <b>3.7</b> (2.2-6.1)    | <b>3.0</b> (1.9-4.7)    | <b>2.4</b> (1.3-4.2)  | <b>1.6</b> (0.9-2.6)         | <b>0.6</b> (0.1-2.6)  | <b>2.4</b> (0.8-7.0)   | <b>2.3</b> (1.1-5.0)  | <b>1.0</b> (0.5-2.3) |
| <i>CWP pure</i>         | <i>0.6</i> (0.3-1.3)           | <i>0.4</i> (0.1-2.0)    | <i>0.8</i> (0.2-3.8)    | <i>0.1</i> (0.03-0.6)   | <i>0.9</i> (0.3-2.8)  | <i>0.3</i> (0.1-0.8)         | <i>0.1</i> (0.02-1.0) | <i>0.4</i> (0.05-2.5)  | <i>0.4</i> (0.1-1.9)  | <i>0.4</i> (0.1-1.4) |
| <b>CF</b>               | <b>7.4</b> (6.1-8.9)           | <b>10.9</b> (7.3-15.8)  | <b>9.8</b> (6.7-13.7)   | <b>8.3</b> (5.9-11.5)   | <b>3.3</b> (2.0-5.6)  | <b>4.6</b> (3.2-6.4)         | <b>3.7</b> (1.5-9.0)  | <b>9.1</b> (4.9-16.3)  | <b>4.6</b> (2.4-8.5)  | <b>2.6</b> (1.4-4.6) |
| <i>CF pure</i>          | <i>2.9</i> (2.1-4.0)           | <i>3.8</i> (1.9-7.2)    | <i>4.0</i> (2.2-7.2)    | <i>3.0</i> (1.7-5.2)    | <i>1.7</i> (0.8-4.0)  | <i>2.5</i> (1.5-4.1)         | <i>2.2</i> (0.5-8.3)  | <i>4.2</i> (1.7-10.2)  | <i>3.2</i> (1.3-7.3)  | <i>1.3</i> (0.5-3.2) |
| <b>WAD</b>              | <b>1.5</b> (1.0-2.2)           | <b>1.0</b> (0.4-2.5)    | <b>1.7</b> (0.9-3.1)    | <b>2.8</b> (1.6-5.0)    | <b>0.6</b> (0.2-1.5)  | <b>1.4</b> (0.8-2.6)         | <b>3.1</b> (1.0-8.9)  | <b>2.0</b> (0.6-6.6)   | <b>1.2</b> (0.4-3.9)  | <b>0.5</b> (0.1-1.5) |
| <i>WAD pure</i>         | <i>0.2</i> (0.1-0.5)           | <i>0.1</i> (0.02-0.9)   | <i>0.2</i> (0.05-0.8)   | <i>0.5</i> (0.1-1.5)    | <i>0</i> (-)          | <i>0.6</i> (0.2-1.8)         | <i>2.3</i> (0.6-8.9)  | <i>1.2</i> (0.2-6.9)   | <i>0</i> (-)          | <i>0</i> (-)         |
| <b>MCS</b>              | <b>1.1</b> (0.7-1.9)           | <b>0.7</b> (0.2-1.9)    | <b>0.6</b> (0.2-1.7)    | <b>1.6</b> (0.9-3.0)    | <b>1.3</b> (0.4-3.8)  | <b>0.5</b> (0.2-1.3)         | <b>0.4</b> (0.1-2.9)  | <b>0.2</b> (0.1-0.9)   | <b>1.0</b> (0.2-4.1)  | <b>0.4</b> (0.1-1.4) |
| <i>MCS pure</i>         | <i>0.6</i> (0.3-1.4)           | <i>0</i> (-)            | <i>0.3</i> (0.1-1.3)    | <i>0.7</i> (0.3-1.7)    | <i>1.0</i> (0.2-3.8)  | <i>0.2</i> (0.03-1.3)        | <i>0</i> (-)          | <i>0</i> (-)           | <i>0.7</i> (0.1-4.5)  | <i>0</i> (-)         |
| <b>1 FSS</b>            | <b>6.0</b> (4.8-7.4)           | <b>7.3</b> (4.7-11.0)   | <b>7.3</b> (4.8-10.8)   | <b>5.5</b> (3.7-8.2)    | <b>5.0</b> (3.1-7.9)  | <b>4.8</b> (3.5-6.7)         | <b>7.0</b> (3.4-13.9) | <b>8.6</b> (4.3-17.1)  | <b>4.8</b> (2.5-9.1)  | <b>2.3</b> (1.2-4.3) |
| <b>2 FSS</b>            | <b>3.7</b> (2.7-4.7)           | <b>5.4</b> (3.0-9.6)    | <b>4.9</b> (3.1-7.8)    | <b>4.3</b> (2.6-6.9)    | <b>1.1</b> (0.6-2.2)  | <b>1.8</b> (1.1-2.9)         | <b>1.2</b> (0.4-3.6)  | <b>3.6</b> (1.2-10.3)  | <b>1.0</b> (0.4-2.5)  | <b>1.7</b> (0.9-3.2) |
| <b>3-5 FSS</b>          | <b>1.4</b> (1.0-2.0)           | <b>1.6</b> (0.8-3.4)    | <b>1.3</b> (0.6-2.8)    | <b>1.8</b> (1.0-3.3)    | <b>1.0</b> (0.5-2.2)  | <b>0.6</b> (0.3-1.4)         | <b>0.4</b> (0.1-2.9)  | <b>1.3</b> (0.4-3.7)   | <b>1.1</b> (0.3-4.0)  | <b>0</b> (-)         |
| <b>BDS</b>              | <b>12.7</b> (11.0-14.6)        | <b>15.6</b> (11.6-20.5) | <b>13.1</b> (9.8-17.4)  | <b>15.6</b> (11.9-20.1) | <b>8.4</b> (6.1-11.5) | <b>7.9</b> (6.2-9.9)         | <b>9.2</b> (5.2-15.9) | <b>12.8</b> (7.8-20.2) | <b>8.0</b> (5.3-12.1) | <b>4.7</b> (3.2-6.7) |
| <b>Single-organ BDS</b> | <b>9.8</b> (8.2-11.6)          | <b>11.7</b> (8.3-16.2)  | <b>9.4</b> (6.7-13.1)   | <b>11.8</b> (8.5-16.1)  | <b>7.2</b> (5.0-10.2) | <b>6.9</b> (5.3-8.8)         | <b>8.4</b> (4.5-15.1) | <b>10.1</b> (5.7-17.2) | <b>7.2</b> (4.6-11.2) | <b>4.3</b> (2.9-6.3) |
| <b>CP subtype</b>       | <b>1.3</b> (0.9-2.0)           | <b>2.7</b> (1.4-4.9)    | <b>1.4</b> (0.4-4.6)    | <b>0.9</b> (0.4-2.1)    | <b>0.9</b> (0.4-2.0)  | <b>1.2</b> (0.6-2.5)         | <b>1.6</b> (0.3-7.1)  | <b>2.2</b> (0.5-9.0)   | <b>1.2</b> (0.4-3.9)  | <b>0.6</b> (0.2-1.7) |
| <b>GI subtype</b>       | <b>4.9</b> (3.8-6.2)           | <b>5.8</b> (3.9-8.7)    | <b>3.7</b> (2.4-5.7)    | <b>6.0</b> (3.6-9.8)    | <b>4.2</b> (2.7-6.5)  | <b>2.9</b> (2.1-4.0)         | <b>3.2</b> (1.3-7.4)  | <b>2.9</b> (1.1-7.3)   | <b>3.4</b> (1.9-5.8)  | <b>2.4</b> (1.4-3.9) |
| <b>MS subtype</b>       | <b>3.6</b> (2.7-4.8)           | <b>2.0</b> (1.0-4.1)    | <b>4.4</b> (2.6-7.4)    | <b>5.5</b> (3.3-9.1)    | <b>2.4</b> (1.3-4.2)  | <b>2.2</b> (1.4-3.5)         | <b>1.7</b> (0.4-6.9)  | <b>1.2</b> (0.4-3.8)   | <b>4.1</b> (2.1-8.0)  | <b>1.5</b> (0.8-2.9) |
| <b>GS subtype</b>       | <b>3.7</b> (2.8-4.9)           | <b>6.3</b> (3.7-10.4)   | <b>4.2</b> (2.3-7.4)    | <b>4.6</b> (2.8-7.3)    | <b>1.4</b> (0.5-3.7)  | <b>2.4</b> (1.5-3.9)         | <b>2.9</b> (1.0-8.4)  | <b>6.3</b> (2.8-13.5)  | <b>1.8</b> (0.9-3.5)  | <b>0.8</b> (0.3-1.8) |
| <b>Multi-organ BDS</b>  | <b>3.0</b> (2.3-4.0)           | <b>4.0</b> (2.4-6.6)    | <b>3.8</b> (2.1-6.9)    | <b>3.9</b> (2.4-6.5)    | <b>1.3</b> (0.6-2.5)  | <b>1.0</b> (0.5-1.9)         | <b>0.8</b> (0.2-3.4)  | <b>2.8</b> (1.0-7.8)   | <b>0.8</b> (0.3-2.4)  | <b>0.4</b> (0.1-1.4) |

**Abbreviations:** FSS=Functional somatic syndrome; IB=irritable bowel; CWP=chronic widespread pain; CF=chronic fatigue; WAD=whiplash associated disorders; MCS=multiple chemical sensitivity; "X pure"=Only fulfilling criteria of that single FSS and no other FSS; BDS=bodily distress syndrome; CP=cardiopulmonary; GI=gastrointestinal; MS=musculoskeletal; GS=general symptoms type; CI=confidence interval

**Table 2: Sex, social factors, physical health, and comorbidity of functional somatic syndromes**

|                                                | No FSS<br>(n=1222) | IB pure<br>(n=70) | CWP pure<br>(n=18) | CF pure<br>(n=92) | WAD pure<br>(n=10) | MCS pure<br>(n=12) | IB<br>(n=161) | CWP<br>(n=96) | CF<br>(n=228) | WAD<br>(n=53) | MCS<br>(n=33) | One FSS<br>(n=202) | Two FSS<br>(n=110) | ≥ 3 FSS<br>(n=45) |
|------------------------------------------------|--------------------|-------------------|--------------------|-------------------|--------------------|--------------------|---------------|---------------|---------------|---------------|---------------|--------------------|--------------------|-------------------|
| <b>Basic, %</b>                                |                    |                   |                    |                   |                    |                    |               |               |               |               |               |                    |                    |                   |
| Sex; Women                                     | 55<br>(52-58)      | 69<br>(56-79)     | 67<br>(41-87)      | 72<br>(61-81)     | 60<br>(26-88)      | 92<br>(62-100)     | 77<br>(70-83) | 77<br>(67-85) | 75<br>(69-81) | 70<br>(56-82) | 76<br>(58-89) | 71<br>(64-77)      | 77<br>(68-85)      | 80<br>(65-90)     |
| <b>Social, %</b>                               |                    |                   |                    |                   |                    |                    |               |               |               |               |               |                    |                    |                   |
| Cohabiting                                     | 77<br>(75-80)      | 64<br>(52-75)     | 82<br>(57-96)      | 76<br>(66-84)     | 70<br>(35-93)      | 67<br>(35-90)      | 65<br>(57-72) | 71<br>(61-80) | 69<br>(63-75) | 70<br>(56-82) | 64<br>(45-80) | 72<br>(65-78)      | 67<br>(57-76)      | 64<br>(49-78)     |
| Currently employed                             | 65<br>(62-68)      | 72<br>(60-83)     | 53<br>(28-77)      | 70<br>(59-79)     | 70<br>(35-93)      | 67<br>(35-90)      | 58<br>(49-65) | 43<br>(33-54) | 60<br>(53-66) | 55<br>(40-69) | 53<br>(35-71) | 69<br>(62-75)      | 53<br>(43-62)      | 40<br>(25-56)     |
| Formerly employed                              | 34<br>(31-36)      | 26<br>(16-38)     | 41<br>(18-67)      | 30<br>(21-41)     | 20<br>(3-56)       | 33<br>(10-65)      | 40<br>(32-48) | 54<br>(43-64) | 38<br>(31-44) | 41<br>(28-56) | 44<br>(26-62) | 30<br>(23-36)      | 43<br>(33-52)      | 58<br>(42-73)     |
| Have never been employed                       | 1.3<br>(1-2)       | 1.4<br>(0.04-8)   | 6.0<br>(0.1-29)    | 0<br>(-)          | 10<br>(0.3-45)     | 0<br>(-)           | 3<br>(1-6)    | 3<br>(1-9)    | 3<br>(1-6)    | 4<br>(0.5-13) | 3<br>(0.1-16) | 2<br>(0.3-4)       | 5<br>(2-10)        | 2<br>(0.1-12)     |
| No vocational training/0 years                 | 11<br>(9-13)       | 19<br>(11-31)     | 6<br>(0.2-30)      | 16<br>(9-25)      | 40<br>(12-74)      | 8<br>(0.2-38)      | 19<br>(13-26) | 14<br>(8-23)  | 17<br>(13-23) | 15<br>(7-28)  | 16<br>(5-33)  | 17<br>(12-23)      | 18<br>(11-27)      | 16<br>(7-31)      |
| Short vocational training /<3 years            | 18<br>(16-20)      | 9<br>(3-18)       | 25<br>(7-52)       | 19<br>(11-29)     | 10<br>(0.3-45)     | 17<br>(2-48)       | 15<br>(10-21) | 19<br>(11-29) | 18<br>(13-24) | 10<br>(3-21)  | 13<br>(4-29)  | 15<br>(11-21)      | 18<br>(11-27)      | 16<br>(7-31)      |
| Medium long vocational training /3-4 years     | 45<br>(42-48)      | 40<br>(28-53)     | 44<br>(20-70)      | 38<br>(28-49)     | 40<br>(12-74)      | 58<br>(28-85)      | 40<br>(32-48) | 40<br>(30-51) | 40<br>(33-47) | 54<br>(39-68) | 47<br>(29-65) | 41<br>(34-48)      | 41<br>(31-51)      | 44<br>(29-60)     |
| Long vocational training /> 4 years,           | 26<br>(24-29)      | 31<br>(21-44)     | 25<br>(7-52)       | 28<br>(19-38)     | 10<br>(0.3-45)     | 17<br>(2-48)       | 26<br>(20-34) | 27<br>(18-37) | 25<br>(19-31) | 21<br>(11-35) | 25<br>(11-43) | 27<br>(21-34)      | 24<br>(16-33)      | 23<br>(12-39)     |
| <b>Physical health, %</b>                      |                    |                   |                    |                   |                    |                    |               |               |               |               |               |                    |                    |                   |
| Poor self-perceived health <sup>a</sup>        | 17<br>(15-19)      | 21<br>(13-33)     | 35<br>(14-62)      | 45<br>(35-56)     | 30<br>(7-65)       | 42<br>(15-72)      | 37<br>(29-45) | 60<br>(49-70) | 50<br>(43-57) | 53<br>(39-67) | 45<br>(28-64) | 35<br>(28-42)      | 47<br>(37-57)      | 67<br>(51-80)     |
| Being limited in daily activities <sup>b</sup> | 21<br>(19-23)      | 26<br>(16-38)     | 35<br>(14-62)      | 44<br>(34-55)     | 30<br>(7-65)       | 42<br>(15-72)      | 40<br>(32-48) | 64<br>(53-74) | 52<br>(45-59) | 59<br>(44-72) | 50<br>(32-68) | 36<br>(29-43)      | 52<br>(42-62)      | 69<br>(53-82)     |
| <b>GP diagnosis and comorbidity, %</b>         |                    |                   |                    |                   |                    |                    |               |               |               |               |               |                    |                    |                   |
| Having FSS according to a doctor <sup>c</sup>  | 21<br>(19-23)      | 64<br>(51-75)     | 41<br>(18-67)      | 30<br>(21-40)     | 90<br>(56-100)     | 17<br>(2-48)       | 67<br>(59-74) | 64<br>(53-73) | 51<br>(45-58) | 87<br>(75-95) | 55<br>(36-72) | 45<br>(38-52)      | 60<br>(50-69)      | 84<br>(71-94)     |
| Physical comorbidity                           | 57<br>(54-60)      | 76<br>(64-85)     | 72<br>(47-90)      | 68<br>(58-78)     | 90<br>(54-99)      | 92<br>(62-100)     | 74<br>(66-81) | 76<br>(66-84) | 71<br>(64-76) | 83<br>(70-92) | 82<br>(65-93) | 74<br>(67-80)      | 71<br>(61-79)      | 80<br>(65-90)     |
| Mental comorbidity                             | 7<br>(6-9)         | 10<br>(4-20)      | 11<br>(1.4-35)     | 22<br>(14-32)     | 0<br>(-)           | 8<br>(0.2-39)      | 19<br>(13-26) | 23<br>(15-33) | 24<br>(19-30) | 8<br>(2-18)   | 12<br>(3-28)  | 15<br>(10-21)      | 23<br>(15-32)      | 24<br>(13-40)     |

Sex, social factors, physical health, and comorbidity of functional somatic syndromes (FSS); % (95% CI). No FSS=Participants not having any FSS; IB=irritable bowel; CWP=chronic widespread pain; CF=chronic fatigue; WAD=whiplash associated disorders; MCS=multiple chemical sensitivity; "X pure"=Only fulfilling criteria of that single FSS and no other FSS. GP = General practitioner. <sup>a</sup> Fair or poor health (41). <sup>b</sup>all of/most of/some of the time (41). <sup>c</sup>Received a diagnosis of at least one of the following: Irritable bowel syndrome, fibromyalgia, chronic fatigue syndrome, whiplash associated disorders, and multiple chemical sensitivity from a general practitioner

**Table 3: Sex, social factors, physical health, and comorbidity of bodily distress syndrome**

|                                                | No BDS<br>(n=1177) | Single-organ BDS<br>(n=327) | CP subtype<br>(n=47) | GI subtype<br>(n=173) | MS subtype<br>(n=107) | GS subtype<br>(n=111) | Multi-organ BDS<br>(n=86) |
|------------------------------------------------|--------------------|-----------------------------|----------------------|-----------------------|-----------------------|-----------------------|---------------------------|
| <b>Basic, %</b>                                |                    |                             |                      |                       |                       |                       |                           |
| Sex; Women                                     | 55<br>(52-57)      | 70<br>(65-75)               | 68<br>(53-81)        | 69<br>(62-76)         | 74<br>(64-82)         | 72<br>(63-80)         | 83<br>(73-90)             |
| <b>Social, %</b>                               |                    |                             |                      |                       |                       |                       |                           |
| Cohabiting                                     | 78<br>(76-81)      | 68<br>(63-73)               | 68<br>(53-81)        | 68<br>(61-75)         | 72<br>(62-80)         | 65<br>(55-74)         | 65<br>(54-75)             |
| Currently employed                             | 66<br>(63-69)      | 59<br>(53-64)               | 64<br>(49-77)        | 57<br>(50-65)         | 53<br>(43-63)         | 61<br>(52-70)         | 57<br>(45-67)             |
| Formerly employed                              | 33<br>(30-35)      | 39<br>(34-45)               | 34<br>(21-49)        | 42<br>(34-49)         | 44<br>(35-54)         | 37<br>(28-47)         | 39<br>(28-50)             |
| Have never been employed                       | 1.3<br>(1-2)       | 2<br>(1-4)                  | 2<br>(0.1-11)        | 1<br>(0.1-4)          | 3<br>(1-8)            | 2<br>(0.2-6)          | 5<br>(1-12)               |
| No vocational training/0 years                 | 11<br>(9-13)       | 16<br>(12-20)               | 16<br>(7-30)         | 16<br>(11-22)         | 12<br>(6-19)          | 19<br>(12-27)         | 19<br>(11-29)             |
| Short vocational training /<3 years            | 18<br>(16-20)      | 16<br>(13-21)               | 16<br>(7-30)         | 16<br>(11-22)         | 23<br>(16-33)         | 16<br>(9-24)          | 19<br>(11-29)             |
| Medium long vocational training /3-4 years     | 45<br>(42-48)      | 42<br>(37-48)               | 41<br>(26-57)        | 40<br>(32-47)         | 45<br>(35-55)         | 41<br>(31-51)         | 36<br>(26-48)             |
| Long vocational training/> 4 years             | 26<br>(24-29)      | 26<br>(21-31)               | 27<br>(15-43)        | 28<br>(22-36)         | 20<br>(13-30)         | 25<br>(17-34)         | 26<br>(17-37)             |
| <b>Physical health, %</b>                      |                    |                             |                      |                       |                       |                       |                           |
| Poor self-perceived health <sup>a</sup>        | 17<br>(15-19)      | 36<br>(31-42)               | 32<br>(19-47)        | 31<br>(24-39)         | 45<br>(36-55)         | 44<br>(34-53)         | 56<br>(45-67)             |
| Being limited in daily activities <sup>b</sup> | 21<br>(18-23)      | 40<br>(35-46)               | 40<br>(26-56)        | 32<br>(25-40)         | 53<br>(43-63)         | 47<br>(38-57)         | 54<br>(42-65)             |
| <b>GP diagnosis and comorbidity, %</b>         |                    |                             |                      |                       |                       |                       |                           |
| Having FSS according to a doctor <sup>c</sup>  | 21<br>(19-23)      | 49<br>(43-55)               | 38<br>(24-53)        | 59<br>(51-66)         | 50<br>(41-60)         | 40<br>(31-50)         | 58<br>(47-69)             |
| Physical comorbidity                           | 56<br>(54-59)      | 74<br>(69-79)               | 70<br>(55-83)        | 76<br>(69-82)         | 72<br>(62-80)         | 70<br>(61-79)         | 70<br>(59-79)             |
| Mental comorbidity                             | 6<br>(5-8)         | 17<br>(14-22)               | 21<br>(11-36)        | 17<br>(12-24)         | 16<br>(10-24)         | 26<br>(18-35)         | 28<br>(19-39)             |

Sex, social factors, physical health, and comorbidity of bodily distress syndrome (BDS); % (95% CI). No BDS=Participants not having BDS; GP = General practitioner. <sup>a</sup> Fair or poor health (41). <sup>b</sup>all of/most of/some of the time (41). <sup>c</sup>Received a diagnosis of at least one of the following: Irritable bowel syndrome, fibromyalgia, chronic fatigue syndrome, whiplash associated disorders, and multiple chemical sensitivity from a general practitioner

**Figure 1: Receiving Operating Characteristics curve of the bodily distress syndrome diagnosis**

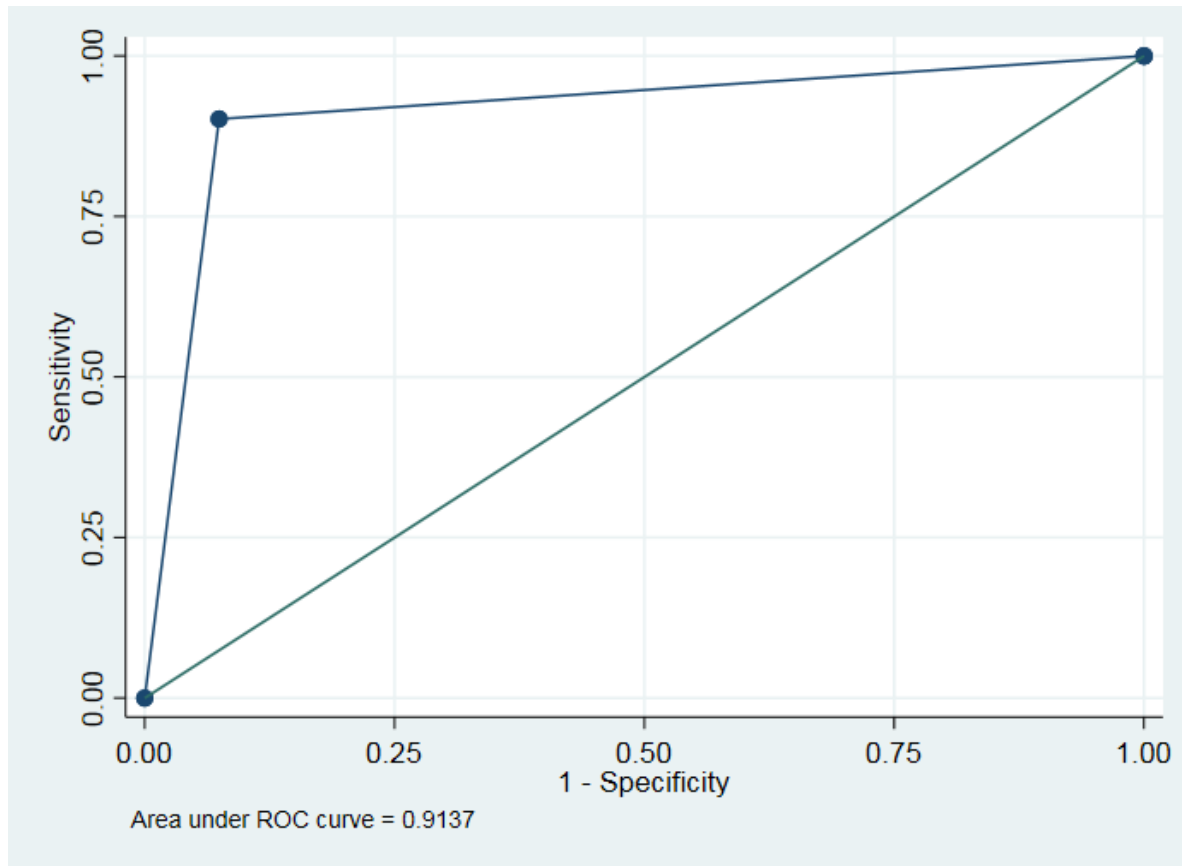

Receiving Operating Characteristics curve of the bodily distress syndrome diagnosis with respect to detecting a functional somatic syndrome diagnosis
